# Supplementary material
Source: PubMed Central journal article supplement (PMC7434425)
Supplement: mmc1.pdf [file mmc1.pdf]

# THE LANCET Microbe

## Supplementary appendix

This appendix formed part of the original submission and has been peer reviewed. We post it as supplied by the authors.

Supplement to: Msomi N, Mlisana K, Oliveira T D. A genomics network established to respond rapidly to public health threats in South Africa. *Lancet Microbe* 2020; published online August 18. [https://doi.org/10.1016/S2666-5247\(20\)30116-6](https://doi.org/10.1016/S2666-5247(20)30116-6).

## Appendix

### **Network for Genomic Surveillance in South Africa (NGS-SA) writing group authors list:**

Nokukhanya Msomi<sup>1,2</sup>, Koleka Mlisana<sup>2</sup>, Carolyn Willianson<sup>3</sup>, Jinal N. Bhiman<sup>4</sup>, Dominique Goedhals<sup>5</sup>, Susan Engelbrecht<sup>6</sup>, Gert Van Zyl<sup>6</sup>, Wolfgang Preiser<sup>6</sup>, Diana Hardie<sup>3</sup>, Marvin Hsiao<sup>3</sup>, Nicola Mulder<sup>7</sup>, Darren Martin<sup>7</sup>, Alan Christoffels<sup>8</sup>, Denis York<sup>9</sup>, Jennifer Giandhari<sup>10</sup>, Eduan Wilkinson<sup>10</sup>, Sureshnee Pillay<sup>10</sup>, Houriiyah Tegally<sup>10</sup>, San Emmanuel James<sup>10</sup>, Aquilah Kanzi<sup>10</sup>, Richard John Lessells<sup>10</sup>, Tulio de Oliveira<sup>10,11</sup>

#### Affiliations:

<sup>1</sup> Discipline of Virology, University of KwaZulu-Natal, Durban, South Africa; <sup>2</sup> National Health Laboratory Service, South Africa. <sup>3</sup> Division of Medical Virology at NHLS Groote Schuur Hospital, University of Cape Town, Cape Town, South Africa. <sup>4</sup> National Institute For Communicable Diseases (NICD), Johannesburg, South Africa. <sup>5</sup> Division of Virology at NHLS Universitas Academic Laboratories, University of The Free State, Bloemfontein, South Africa. <sup>6</sup> Division of Medical Virology at NHLS Tygerberg Hospital, Stellenbosch University, South Africa. <sup>7</sup> The Computational Biology Division at The University of Cape Town, Cape Town, South Africa. <sup>8</sup> South African National Bioinformatics Institute, University of the Western Cape, South Africa. <sup>9</sup> Molecular Diagnostics Services, Durban, South Africa. <sup>10</sup> KwaZulu-Natal Research Innovation & Sequencing Platform (KRISP), University of Kwazulu-Natal, Durban, South Africa. <sup>11</sup> Centre for the AIDS Programme of Research in South Africa (CAPRISA), University of Kwazulu-Natal, Durban, South Africa.

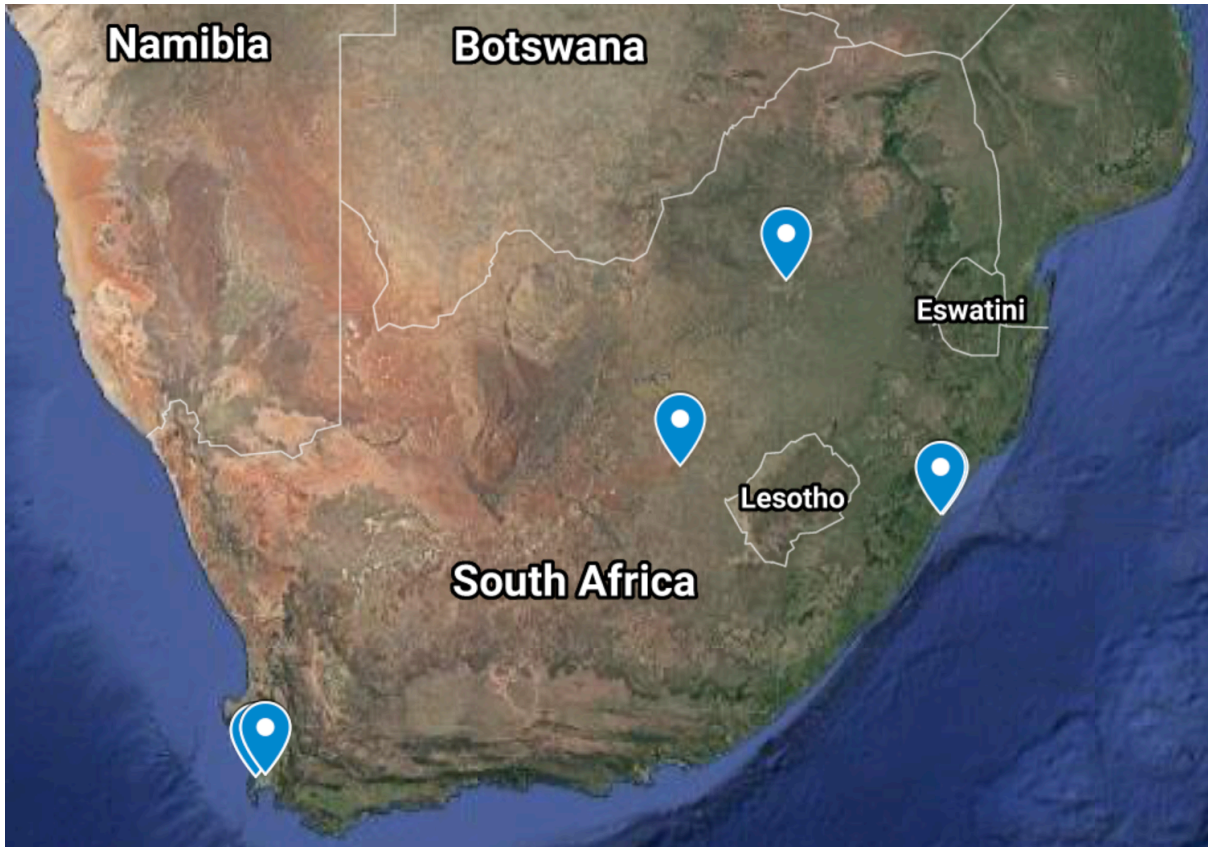

**Figure:** Locations of current NGS-SA partners across South Africa.

**Founding partners:**

The Division of Medical Virology at NHLS Tygerberg Hospital, Stellenbosch University

The Division of Medical Virology at NHLS Groote Schuur Hospital, University of Cape Town

The Division of Medical Virology at NHLS Universitas Academic Laboratories, University of the Free State

The Division of Virology at NHLS Inkosi Albert Luthuli Central Hospital, University of Kwazulu-Natal  
National Institute for Communicable Diseases (NICD)

The Computational Biology Division at The University of Cape Town

South African National Bioinformatics Institute (SANBI), University of the Western Cape

Center For Quantum Technology at University of Kwazulu-Natal

Centre for the AIDS Program of South Africa (CAPRISA)

KwaZulu-Natal Research Innovation & Sequencing Platform (KRISP), University of Kwazulu-Natal
